# Supplementary material for: Inhibition of ribosome biogenesis in the epidermis is sufficient to trigger organism-wide growth quiescence independently of nutritional status in C. elegans
Source: PubMed Central journal article supplement (PMC10499265; doi:10.1371/journal.pbio.3002276), 2023-08-31

Fig S2B Raw Images

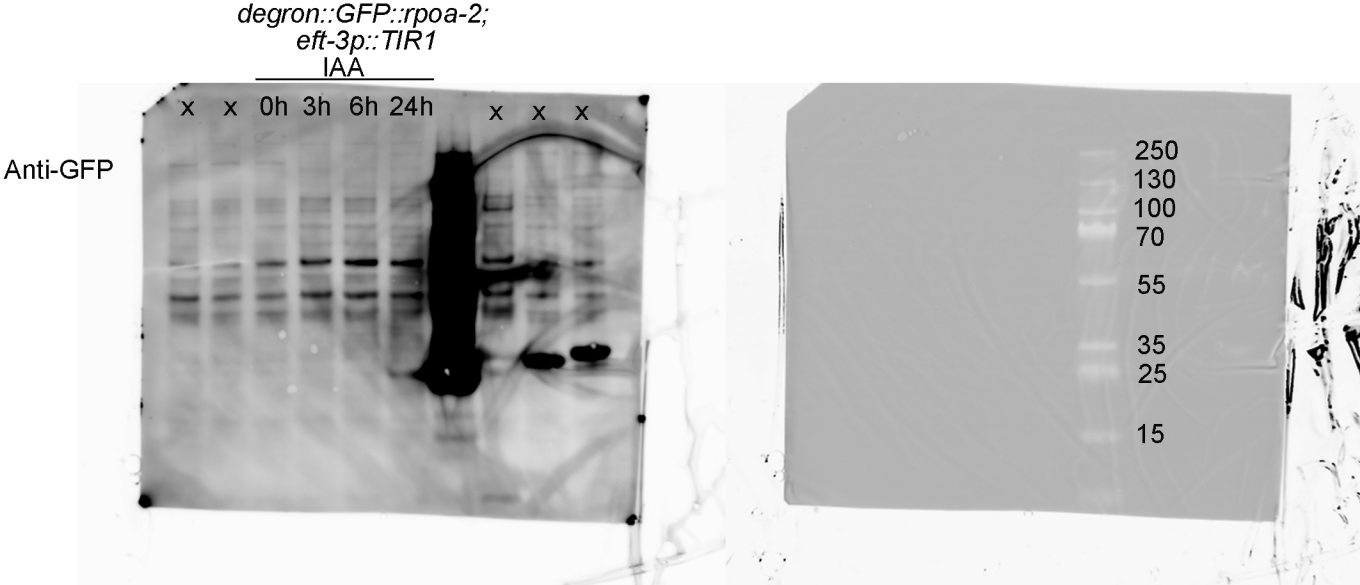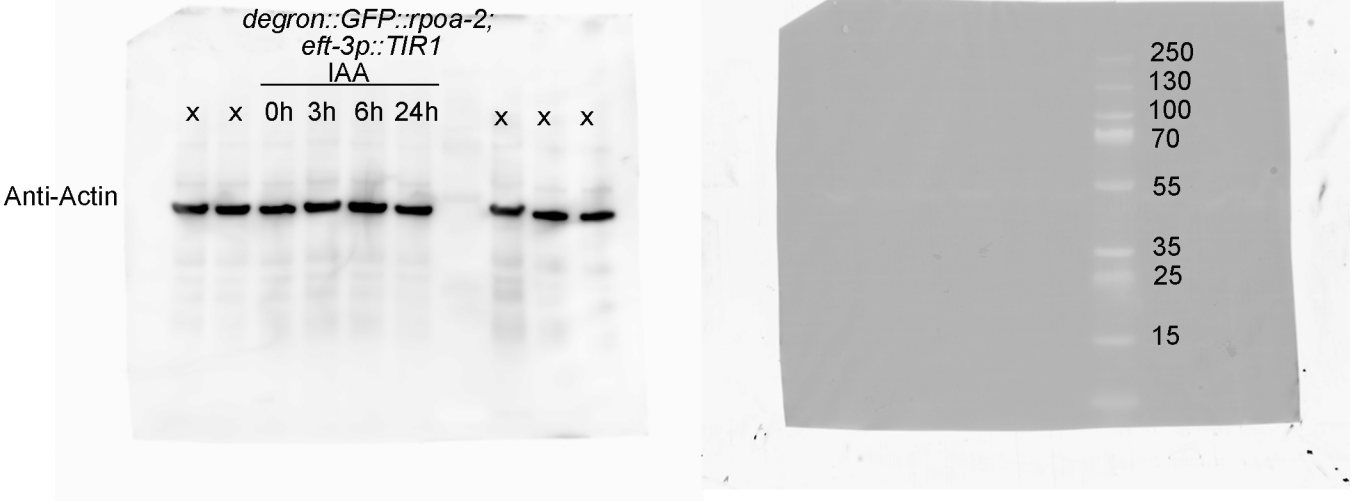

Supplement: pbio.3002276.s021.pdf [file pbio.3002276.s021.pdf]
